# Supplementary material for: The Effect of 8,5′-Cyclo 2′-deoxyadenosine on the Activity of 10-23 DNAzyme: Experimental and Theoretical Study
Source: MDPI journal article supplement (doi:10.3390/ijms25052519), 2024-02-21
Supplement: s1 [file s1]

| Oligonucleotide | Mass calc. | Mass found |
|-----------------|------------|------------|
| wt-Dz           | 10798.107  | 10798.8008 |
| 5-R-Dz          | 10796.047  | 10795.8008 |
| 5-S-Dz          | 10796.047  | 10795.8008 |
| 15-R-Dz         | 10796.047  | 10794.9004 |
| 15-S-Dz         | 10796.047  | 10795.8008 |
| RNA substrate   | 6650.018   | 6648.9004  |

#### RNA substrate

5' – CUC AAG UCU UGU AUG GGA CUC 3'

#### wt-Dz

5' – GAG TCC CAT A GG CTA GCT ACA ACG A AA GAC TTG AG 3'

#### 5-R-Dz

5' – GAG TCC CAT A GGCT R-cdAGCT ACA ACGA AA GAC TTG AG 3'

#### 5-S-Dz

5' – GAG TCC CAT A GG CT S-cdAGCT ACA ACG A AAGAC TTG AG 3'

#### 15-R-Dz

5' – GAG TCC CAT A GG CTA GCTACA ACG R-cdA AA GAC TTG AG 3'

#### 15-S-Dz

5' – GAG TCC CAT A GG CTA GCTACA ACG S-cdA AA GAC TTG AG 3'
